# Supplementary material
Source: PubMed Central journal article supplement (PMC4624053)
Supplement: NIHMS678791-supplement-Supp_Material.pdf [file NIHMS678791-supplement-Supp_Material.pdf]

# **Supporting Information: Joint Design of Large-Tip-Angle Parallel RF Pulses and Blipped Gradient Trajectories**

Zhipeng Cao<sup>1,2</sup>, Manus J Donahue<sup>1,3</sup>, and William A. Grissom<sup>1,2,3,4\*</sup>

February 17, 2015

<sup>1</sup>Vanderbilt University Institute of Imaging Science, Nashville, TN, United States

<sup>2</sup>Department of Biomedical Engineering, Vanderbilt University, Nashville, TN, United States

<sup>3</sup>Department of Radiology, Vanderbilt University, Nashville, TN, United States

<sup>4</sup>Department of Electrical Engineering, Vanderbilt University, Nashville, TN, United States

---

\*Corresponding author:

William A Grissom

Department of Biomedical Engineering

Vanderbilt University

5824 Stevenson Center

Nashville, TN 37235 USA

E-mail: will.grissom@vanderbilt.edu

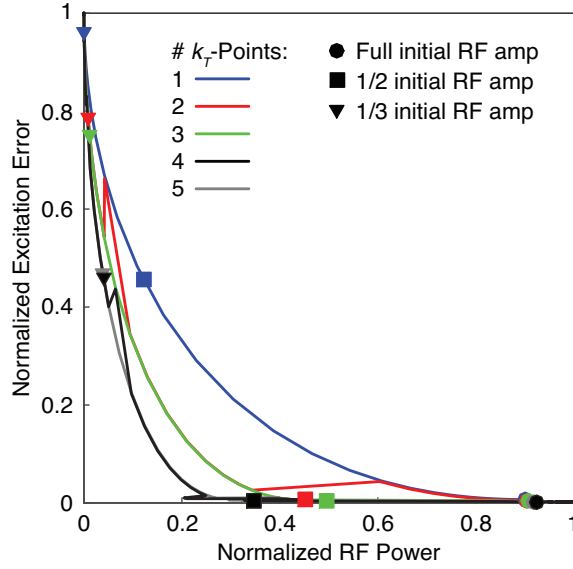

Figure S1: L-Curves for two-channel 1-5  $k_T$ -point pulses, designed for  $180^\circ$  refocusing in one subject's axial brain slice. Each point in the curve corresponds to a pulse design with a different fixed integrated RF power regularization parameter  $\lambda$  (with periodic re-computation turned off in the LTA algorithm). As the number of  $k_T$ -points increases, the elbow in the curves becomes more pronounced, reflecting the opportunity for an increasingly favorable tradeoff between integrated RF power and excitation error. Also plotted are error-power coordinates returned by the algorithm *with*  $\lambda$  re-computation for each number of  $k_T$ -points and for different initial STA RF pulses. The initial RF pulses were obtained using the STA algorithm without integrated power regularization, and were either used as-is ('Full initial RF amp' case), or were scaled by 1/2 or 1/3. The positions of the final LTA coordinates for each of these initializers indicate that the LTA algorithm (with  $\lambda$  re-computation) tends to preserve the error-power balance of the initial RF pulses.

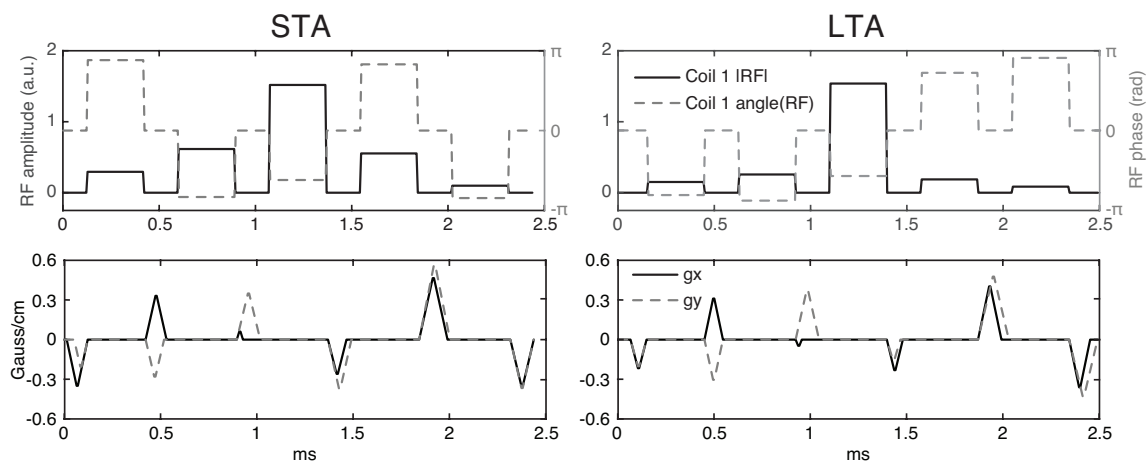

Figure S2: Comparison of STA and LTA  $k_T$ -points pulses for one transmit coil, from the in vivo experiment of Figure 5 of the main text. Overall, each subpulse of the LTA pulse has a different phase and amplitude compared to the initial STA pulse, and the gradient blips were also rescaled by the LTA design.
